# Supplementary material for: Ferritin cages as building blocks for higher-order assembly through copper–sulfur bonds for HER analysis
Source: Royal Society of Chemistry journal article supplement (doi:10.1039/d4ra02931c), 2024-01-01
Supplement: d4ra02931c1.pdf [file d4ra02931c1.pdf]

Electronic Supplementary Information for

**Assembly of cysteine-modified ferritin cages via copper template  
manipulation**

Ruoxuan Sun and Sierin Lim \*

School of Chemistry, Chemical Engineering and Biotechnology, Nanyang Technological  
University, Singapore

**Corresponding author**

\*E-mails: [slim@ntu.edu.sg](mailto:slim@ntu.edu.sg)

## Figures

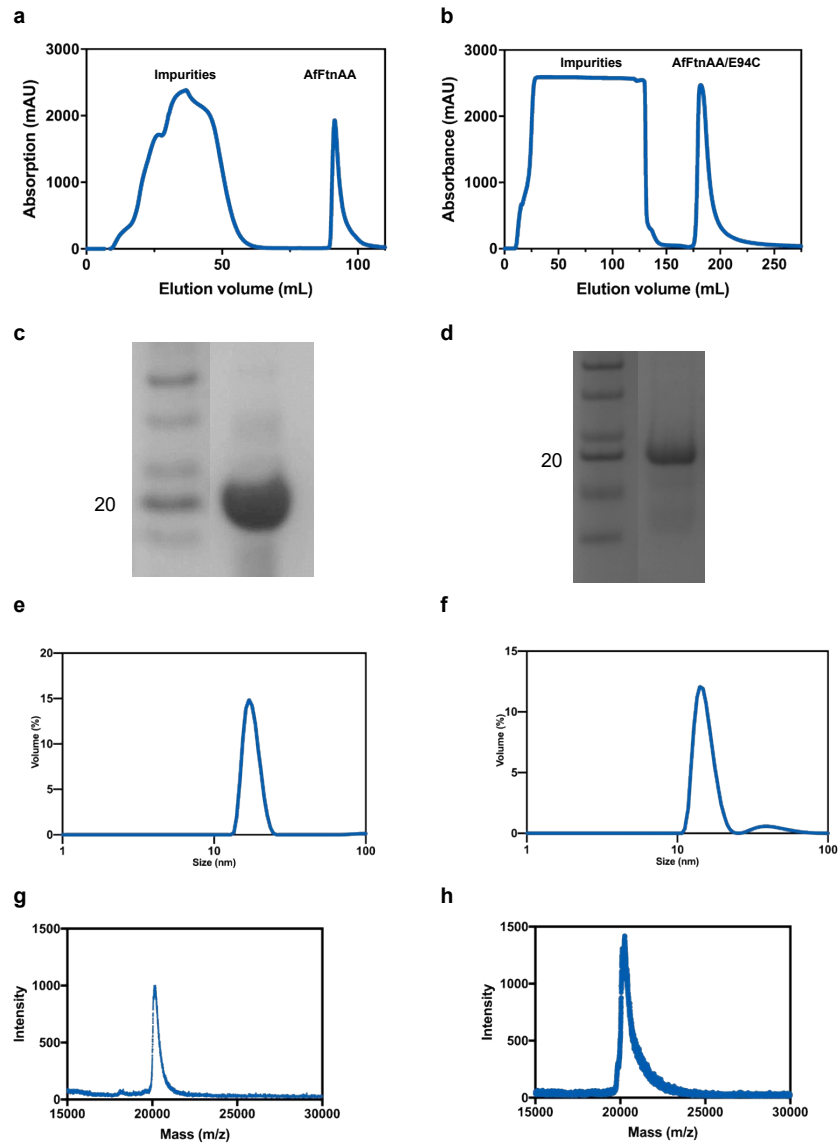

**Fig S1.** (a) Hydrophobic interaction chromatography profile of AfFtnAA. (b) Hydrophobic interaction chromatography profile of AfFtnAA/E94C. (c) SDS-PAGE of AfFtnAA. (d) SDS-PAGE of AfFtnAA/E94C. (e) DLS characterization of AfFtnAA. (f) DLS characterization of AfFtnAA/E94C. (g) MALDI TOF result of AfFtnAA. (h) MALDI TOF result of AfFtnAA/E94C.

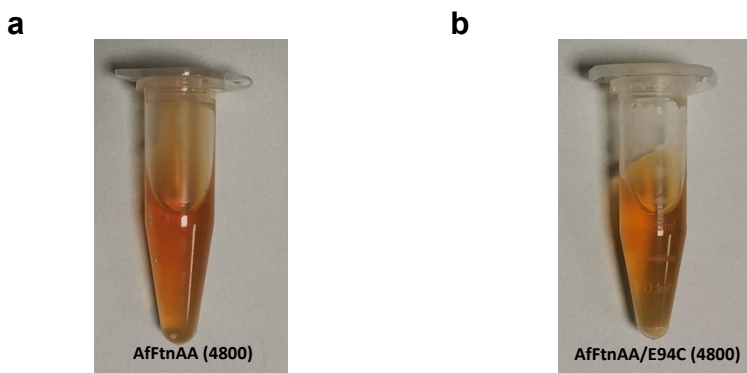

**Fig. S2** (a) Picture of purified and 4800 iron-loaded AfFtnAA. (b) Picture of purified and 4800 iron-loaded AfFtnAA/E94C.

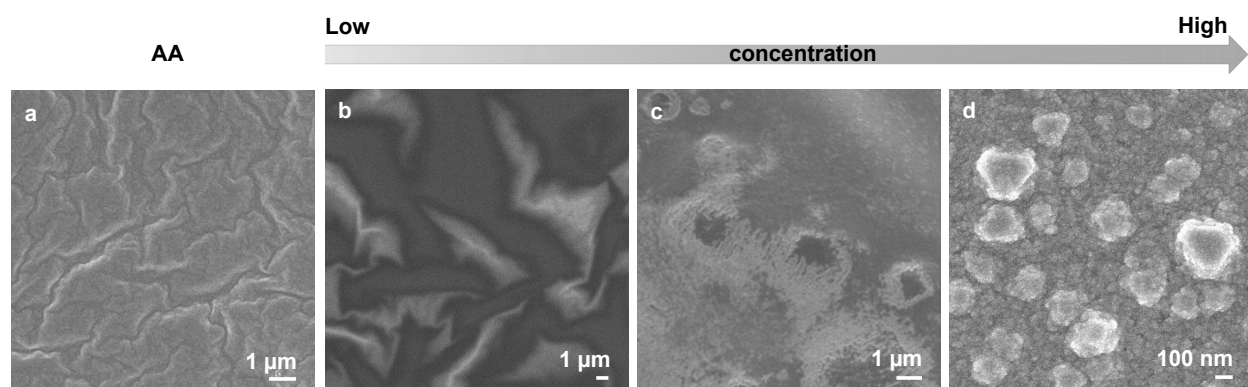

**Fig. S3** Morphologies of the assembly based on AfFtnAA/E94C of different concentrations on Si substrate via freeze dry. (a) SEM image AfFtnAA serving as the control group. (b-d) SEM image on AfFtnAA/E94C of different concentrations Si substrate.

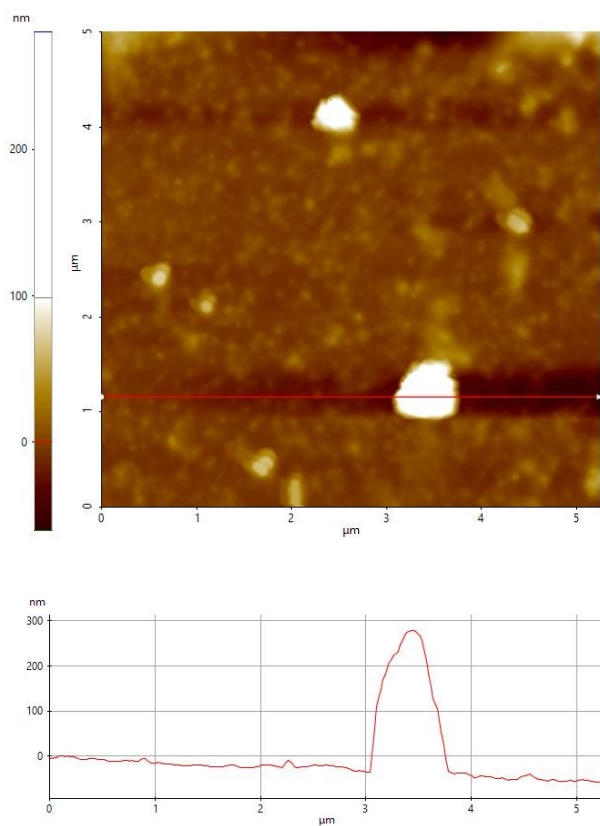

**Fig. S4** AFM characterization of AfFtnAA on Cu substrate.

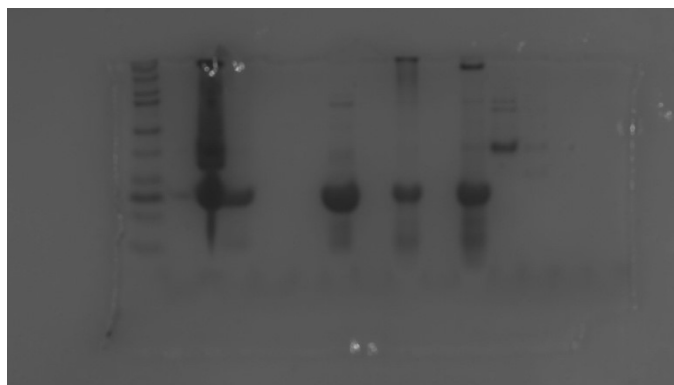

**Fig. S5** Uncropped images of Fig. S1 (c).

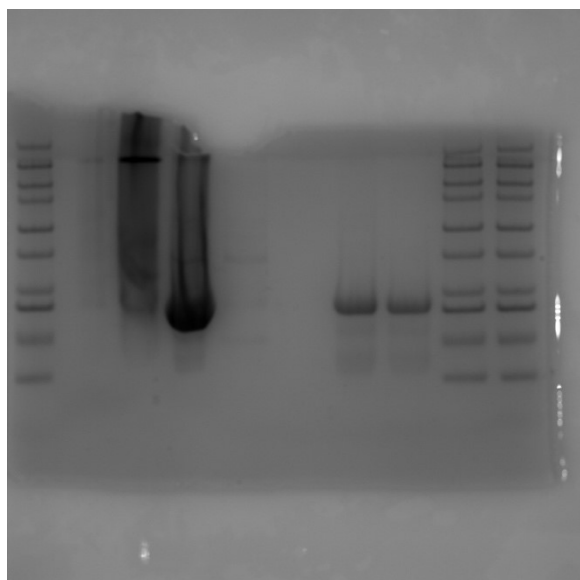

**Fig. S6** Uncropped images of Fig. S1 (d).
